# Supplementary material for: Effects of onabotulinumtoxinA treatment in chronic migraine patients with and without daily headache at baseline: results from the COMPEL Study
Source: Springer Nature journal article supplement (doi:10.1186/s10194-018-0953-0), 2019-02-01
Supplement: MOESM1 [file 16437652]

**Supplementary Figure 1:** Effect of onabotulinumtoxinA on (A) headache day frequency and (B) moderate/severe headache day frequency in patients with and without daily headache at baseline.

**A**

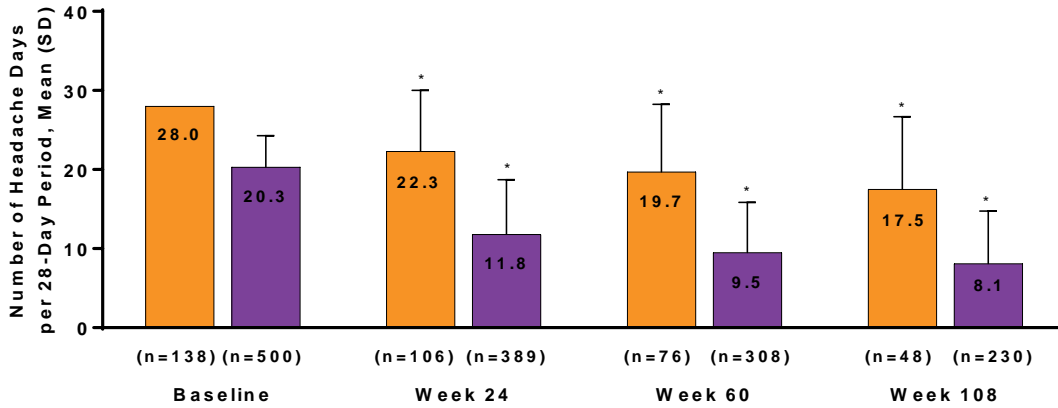

**B**

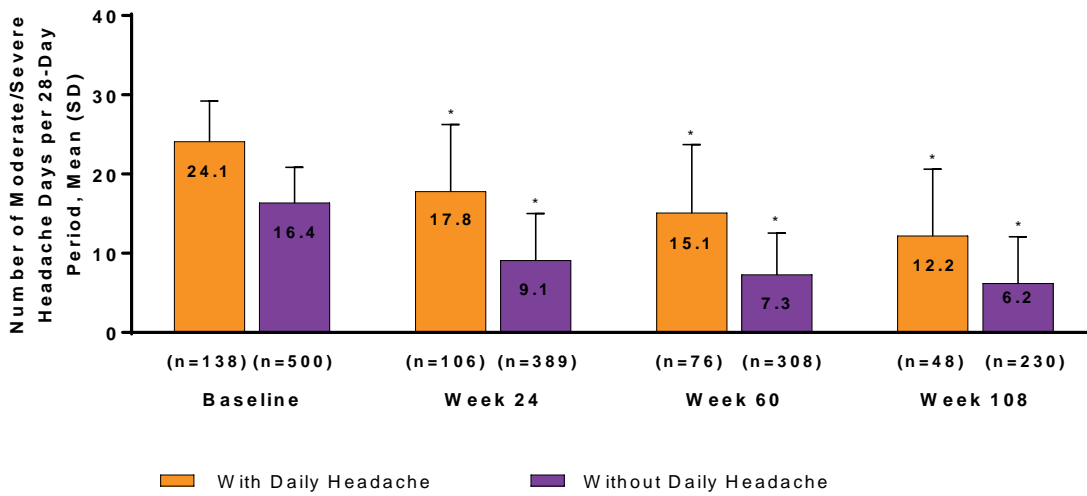

\* $P < 0.001$  for within group comparison with baseline.
